# Supplementary material
Source: Springer Nature journal article supplement (https://www.springermedizin.de/resource/supplementary/12874_2012_966_MOESM4_ESM.pdf/9433258)

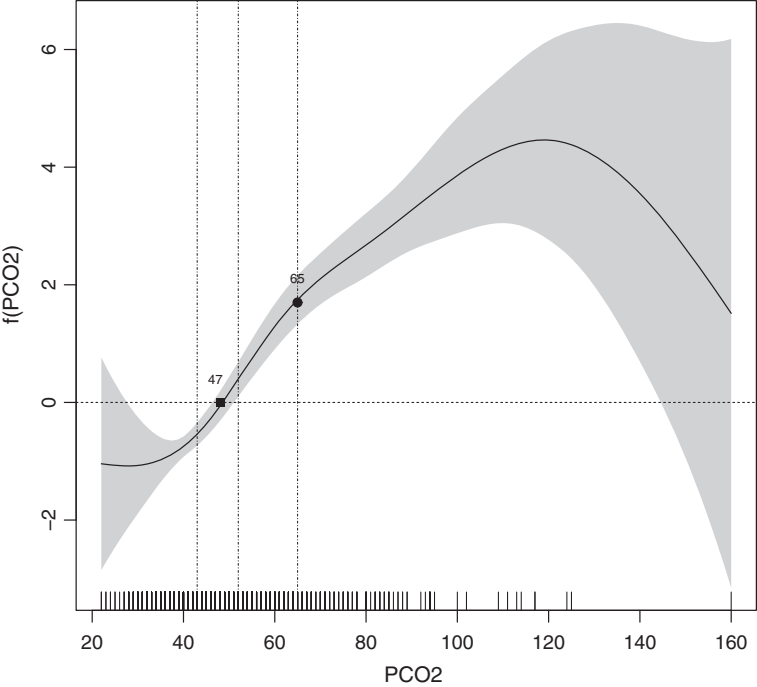

Supplement: MOESM4 [file 9433258]
